# Supplementary material for: CuBi2O4nanocrystals integrated with polyaniline nanobelt arrays for weak light photomultiplication type photodetector
Source: Royal Society of Chemistry journal article supplement (doi:10.1039/d2se01410f), 2022-11-29
Supplement: d2se01410f1.pdf [file d2se01410f1.pdf]

## Supporting Information

### **CuBi<sub>2</sub>O<sub>4</sub> Nanocrystals Integrated with the Polyaniline Nanobelt Arrays for Weak Light Photomultiplication Type Photodetector**

**Anshika Singh<sup>a</sup>, Pratima Chauhan<sup>a</sup>, Arpit Verma<sup>b</sup>, Bal Chandra Yadav<sup>b</sup>**

<sup>a</sup>Advanced Nanomaterials Research Laboratory, U.G.C. Centre of Advanced Studies,  
Department of Physics, University of Allahabad, Prayagraj-211002, India

<sup>b</sup>Nanomaterials and Sensors Research Laboratory, Babasaheb Bhimrao Ambedkar  
University, Lucknow-226025, U.P., India

*Email-id: anshikasingh@allduniv.ac.in; mangu167@yahoo.co.in*

#### **1. Surface Morphological Analysis**

Surface morphology of the CuBi<sub>2</sub>O<sub>4</sub>NCs investigated by the scanning electron micrographs (SEM) and in Fig. S1 (a and b) shows nanopellets like structures at 2 μm. Fig. S1 (c and d) shows symmetric and almost the same size as the pellets as clearly shown in the micrographs at 1 μm and 0.5 μm respectively.

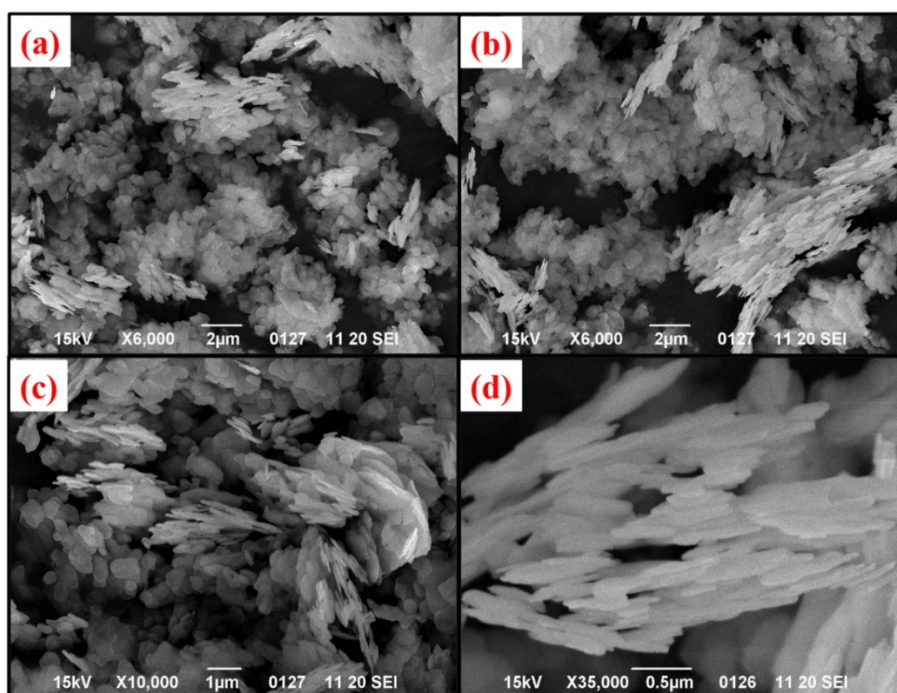

**Fig. S1** SEM images at (a) 2 μm (b) 2 μm (c) 1 μm (d) 0.5 μm.

## 2. X-ray Diffraction

In the XRD pattern of  $\text{CuBi}_2\text{O}_4$  the characteristics peaks are (200), (211), (220), (002), (102), (310), (112), (311), (202), (400), (222), (312), (411), (420), (213), (402), (332), (502), (442), and (612) found, which corresponds to the  $2\theta$  angles of  $21.051^\circ$ ,  $26.597^\circ$ ,  $28.143^\circ$ ,  $31.015^\circ$ ,  $32.070^\circ$ ,  $32.782^\circ$ ,  $35.359^\circ$ ,  $36.390^\circ$ ,  $38.648^\circ$ ,  $42.697^\circ$ ,  $43.164^\circ$ ,  $45.888^\circ$ ,  $46.477^\circ$ ,  $48.440^\circ$ ,  $52.195^\circ$ ,  $53.766^\circ$ ,  $55.852^\circ$ ,  $63.240^\circ$ ,  $71.020^\circ$ , and  $74.848^\circ$ . The average crystallite size was calculated by the Scherrer formula as in relation (S1) and found to be 37.37 nm.

$$D = \frac{k\lambda}{\beta \cos \theta} \quad (\text{S1})$$

Where  $k$  is the Scherrer constant,  $\lambda$  is the Cu  $K_\alpha$  wavelength (0.15406 nm),  $\beta$  is the full width and half maxima and  $\theta$  is the Bragg's angle.

## 3. Characterization Tools

The structural study is carried out using a Bruker D8 Advance Eco X-ray diffractometer, and the surface morphological examinations are carried out using a JEOL JSM 6490 LV Scanning Electron Microscope (SEM). Thermo-Scientific's Nicole 6700 spectrometer performs Fourier transform infrared spectroscopy. We utilize a Thermo-Scientific Evolution 201 spectrophotometer for UV-Visible spectroscopy. Malvern Nanozetasizer, Model: NZS90, UK, is used to measure particle size. The photodetector device was examined using a Keithley source meter (6517 B), a source of wavelength 365 nm and Newport optical meter.

## 4. Device Fabrication

For the fabrication of the photodetector device, the following processes were followed in order. The first procedure involved cutting cotton substrates into  $1 \times 1 \text{ cm}^2$  and dissolving the 0.2 g of  $\text{CuBi}_2\text{O}_4$ -polyaniline in 1.5 mL of N-Methyl-2-pyrrolidone (NMP) in an ultrasonic bath for 50

minutes. This cotton substrate was dipped into the solution and dried in a 30°C oven for 30 min. This process was repeated three times to form a dense film of CuBi<sub>2</sub>O<sub>4</sub>-polyaniline on cotton fabrics. In the last phase, silver electrodes with a channel width of 2 mm and a length of 3 mm were painted on the substrates.

## 5. Results and Discussion

All the parameters of the CuBi<sub>2</sub>O<sub>4</sub>-polyaniline photodetector device at the illumination intensity of 50 μW/cm<sup>2</sup> with varying potential drift as tabulated in Table S1. On the other hand, figures of merit of the CuBi<sub>2</sub>O<sub>4</sub>-polyaniline photodetector device for different illumination intensities at the potential drift of 1 V.

Qualitative parameters for our CuBi<sub>2</sub>O<sub>4</sub>-polyaniline photodetector device

Table S1

| <b>On/Off ratio (Ip/Id)</b> | <b>Responsivity (A/W)</b> | <b>LDR (dB)</b> | <b>EQE (%)</b>        | <b>Detectivity (Jones)</b> | <b>NEP (W)</b>         | <b>Gain</b>           | <b>Voltage (V)</b> |
|-----------------------------|---------------------------|-----------------|-----------------------|----------------------------|------------------------|-----------------------|--------------------|
| 7.55                        | 32.77                     | 17.56           | 1.11×10 <sup>4</sup>  | 3.66×10 <sup>12</sup>      | 3.05×10 <sup>-7</sup>  | 7.39×10 <sup>10</sup> | 50                 |
| 4.25                        | 16.26                     | 12.57           | 5.51×10 <sup>3</sup>  | 1.82×10 <sup>12</sup>      | 6.15×10 <sup>-7</sup>  | 3.66×10 <sup>10</sup> | 25                 |
| 3.18                        | 10.93                     | 10.06           | 3.70×10 <sup>3</sup>  | 1.22×10 <sup>12</sup>      | 9.15×10 <sup>-7</sup>  | 2.46×10 <sup>10</sup> | 10                 |
| 2.64                        | 8.19                      | 8.43            | 2.77×10 <sup>3</sup>  | 9.16×10 <sup>11</sup>      | 1.22×10 <sup>-6</sup>  | 1.85×10 <sup>10</sup> | 5                  |
| 2.31                        | 6.55                      | 7.27            | 2.22×10 <sup>3</sup>  | 7.33×10 <sup>11</sup>      | 1.53×10 <sup>-6</sup>  | 1.47×10 <sup>10</sup> | 2                  |
| 2.07                        | 5.38                      | 6.35            | 1.824×10 <sup>3</sup> | 6.016×10 <sup>11</sup>     | 1.858×10 <sup>-6</sup> | 1.21×10 <sup>10</sup> | 1                  |

Table S2

| <b>On/Off ratio (Ip/Id)</b> | <b>Responsivity (A/W)</b> | <b>LDR (dB)</b> | <b>EQE (%)</b> | <b>Detectivity (Jones)</b> | <b>NEP (W)</b>        | <b>Gain</b>        | <b>Intensity (<math>\mu\text{W}/\text{cm}^2</math>)</b> |
|-----------------------------|---------------------------|-----------------|----------------|----------------------------|-----------------------|--------------------|---------------------------------------------------------|
| 3.14                        | 1.43                      | 9.94            | 484.11         | $1.59 \times 10^{11}$      | $7.00 \times 10^{-6}$ | $3.22 \times 10^9$ | 375                                                     |
| 2.79                        | 2.25                      | 8.94            | 761.95         | $2.51 \times 10^{11}$      | $4.45 \times 10^{-6}$ | $5.06 \times 10^9$ | 200                                                     |
| 2.35                        | 2.25                      | 7.42            | 761.94         | $2.51 \times 10^{11}$      | $4.45 \times 10^{-6}$ | $5.06 \times 10^9$ | 150                                                     |
| 2.13                        | 2.82                      | 6.55            | 955.42         | $3.15 \times 10^{11}$      | $3.55 \times 10^{-6}$ | $6.35 \times 10^9$ | 100                                                     |
| 2.07                        | 5.38                      | 6.35            | 1824.37        | $6.02 \times 10^{11}$      | $1.85 \times 10^{-6}$ | $1.21 \times 10^9$ | 50                                                      |
